# Supplementary material
Source: PubMed Central journal article supplement (PMC2364611)
Supplement: NIHMS45762-supplement-01.pdf [file NIHMS45762-supplement-01.pdf]

**Molecular Cell, Volume 29**

**Supplemental Data**

**TBL1 and TBLR1 Phosphorylation on Regulated Gene**

**Promoters Overcomes Dual CtBP and NCoR/SMRT**

**Transcriptional Repression Checkpoints**

**Valentina Perissi, Claudio Scafoglio, Jie Zhang, Kenneth A. Ohgi, David W. Rose,  
Christopher K. Glass, and Michael G. Rosenfeld**

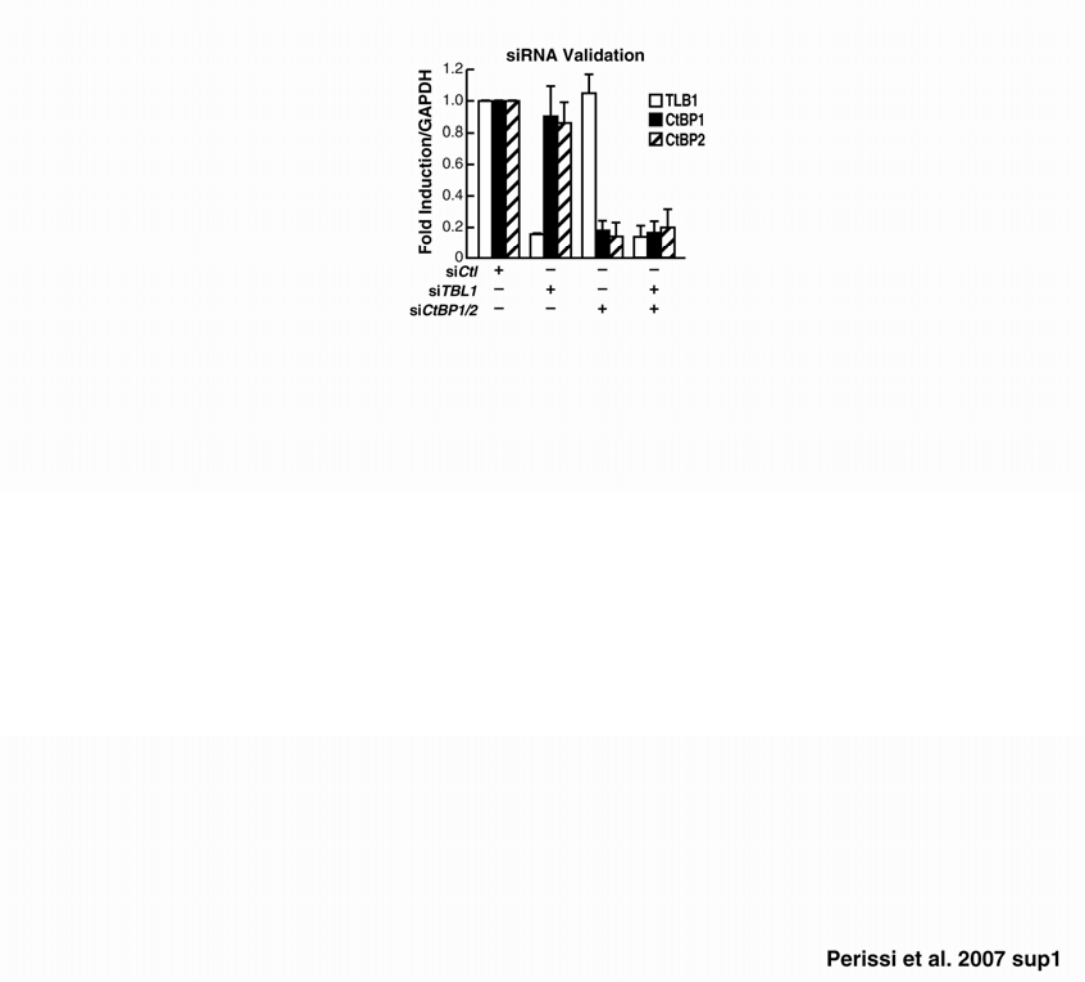

**Figure S1. siRNA Validation from Figure 1D**

mRNA expression levels of TBL1, CtBP1 and CtBP2 are measured by RT-PCR to validate siRNA efficiency. Normalization is done using the house-keeping gene GAPDH.

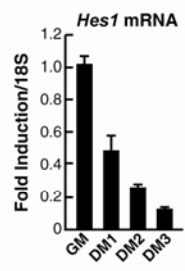

**Figure S2. *Hes1* Gene Expression in C2C12 Cells**

RT-PCR analysis of *Hes1* expression in C2C12 cells at different days after induction of skeletal muscle differentiation.

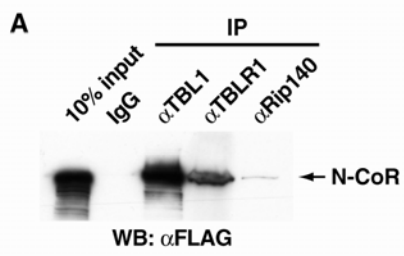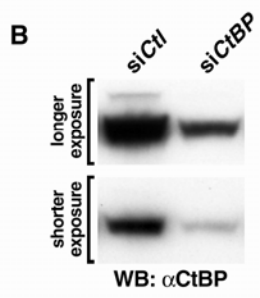

**Figure S3. TBL1 Interacts with CtBP and Mediates Its Degradation**

**(A)** Immunoprecipitation of transiently transfected Flag-NCOR by  $\alpha$ -TBLR1 and  $\alpha$ -TBLR1 confirming that both antibodies are equally efficient in immunoprecipitating a known interacting protein.

**(B)** Western blot  $\alpha$ -CtBP in transiently transfected U2OS cells confirming the specificity of the bands identified by the antibody.

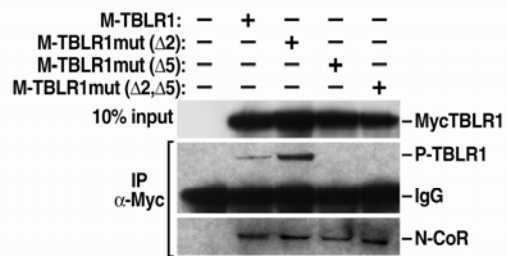

**Figure S4. Validation of Mono-P-TBLR1 Antibody**

Immunoprecipitation of transiently transfected Flag-TBLR1 (F-TBLR1) or Myc-TBLR1 (M-TBLR1) wildtype and mutated at the two phosphorylation sites (“5” corresponds to Ser123 and “2” corresponds to Ser199/Thr203/Ser204) confirmed site specificity of the  $\alpha$ -MonoP-TBLR1.



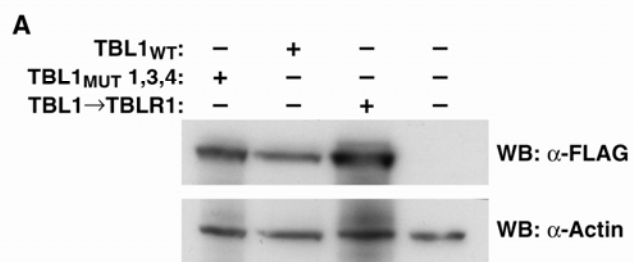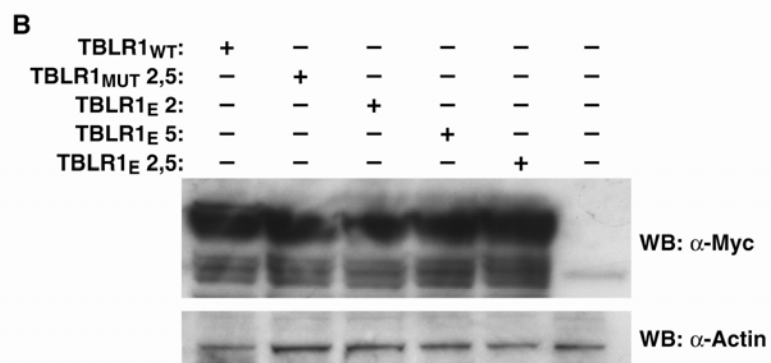

**Figure S5. Validation of the Expression Plasmids for TBL1 and TBLR1 Wild-Type and Mutants**

**(A)** Western blot  $\alpha$ -FLAG for TBL1 wild type and mutant expression plasmids.

**(B)** Western blot  $\alpha$ -Myc for TBLR1 wild type and mutant expression plasmids.

CLUSTAL W (1.83) multiple sequence alignment

```

hTBL1R      MSISSDEVNFLVYRYLQESGFSSAFTFGIESHISQSNINGALVPPAALISIIQKGLQYV 60
mTBL1R      MSISSDEVNFLVYRYLQESGFSSAFTFGIESHISQSNINGALVPPAALISIIQKGLQYV 60
hTBL1X      MSITSDEVNFLVYRYLQESGFSSAFTFGIESHISQSNINGTLVPPAALISIIQKGLQYV 60
mTBL1X      MSITSDEVNFLVYRYLQESGFSSAFTFGIESHISQSNINGTLVPPAALISIIQKGLQYV 60
***:*****:*****:*****:*****:*****

hTBL1R      EAEVSI5-PKCNEDGTLFDGRPIESLSLIDAVMPDVVQTRQQAYRDKLAQQQAAAAAAAAAAAA-- 118
mTBL1R      EAEVSI5-PKCNEDGTLFDGRPIESLSLIDAVMPDVVQTRQQAYRDKLAQQQAAAAAAAAAAAA-- 118
hTBL1X      EAEI5-PKCSINEDGTVFDGRPIESLSLIDAVMPDVVQTRQQAFREKLAQQQASAAAAAAAAATAA 120
mTBL1X      EAEI5-PKCSINEDGTVFDGRPIESLSLIDAVMPDVVQTRQQAFREKLAQQQANAAAAAAAAATAA 120
***:*****:*****:*****:*****:*****

hTBL1R      -----SQ5-PKCGS1-CKIAKNGENTANGEENGAHTIANNHTDMMEVDGDVEIPP1-CKINKAVVLR 166
mTBL1R      -----NQ5-PKCGS1-CKIAKNGENTANGEENGAHTIANNHTDMMEVDGDVEIPSNKAVVLR 166
hTBL1X      AT-AATTSAGVSHQNP5-PKCSKNREATVNGEENRAHSVNN-HAKPMEIDGEVEIP1-CKISKATVLR 178
mTBL1X      ATSTAATTPAAAAQ5-PKCNP1-CKIKNGEATVNGEENGAHAINN-HSKPMEIDGEVEIP1-CKISKATVLR 179
:.....* * *.***** *: : * *:. **:*:*****.***

hTBL1R      GHESEV2-CK1/GSK3FI2-CK1/GSK3CAWNPVSDLLASGSGDSTARIWNLSENSTSGSTQLVLRHCIREGGQDVPSNK 226
mTBL1R      GHESEV2-CK1/GSK3FI2-CK1/GSK3CAWNPVSDLLASGSGDSTARIWNLSENSTSGSTQLVLRHCIREGGQDVPSNK 226
hTBL1X      GHESEV2-CK1/GSK3FI2-CK1/GSK3CAWNPVSDLLASGSGDSTARIWNLNENSN2-CK1/GSK3GGSTQLVLRHCIREGGHDVPSNK 238
mTBL1X      GHESEV2-CK1/GSK3FI2-CK1/GSK3CAWNPVSDLLASGSGDSTARIWNLNENSN2-CK1/GSK3GGSTQLVLRHCIREGGHDVPSNK 239
*****:*****:*****:*****:*****:*****

hTBL1R      DVTSLDWNSEGTLLATGSYDGFARIWTKDGNLASTLGQHKGPIFALKW3-CK1NKGNF3-CK1ILSAGV 286
mTBL1R      DVTSLDWNSEGTLLATGSYDGFARIWTKDGNLASTLGQHKGPIFALKW3-CK1NKGNF3-CK1ILSAGV 286
hTBL1X      DVTSLDWN3-CK1NGTLLATGSYDGFARIWTE3-CK1DGNLASTLGQHKGPIFALKW3-CK1NRKGN3-CK1YILSAGV 298
mTBL1X      DVTSLDWN3-CK1SDGTLLATGSYDGFARIWTE3-CK1DGNLASTLGQHKGPIFALKW3-CK1NKGN3-CK1YILSAGV 299
*****:*****:*****:*****:*****:*****

hTBL1R      DKTTII3-CK1WDAHTGEAKQ3-CK1QFPFHSAPALDVDWQSNNTFASCSTDMCIHVCKLGQDRPIKTFQ 346
mTBL1R      DKTTII3-CK1WDAHTGEAKQ3-CK1QFPFHSAPALDVDWQSNNTFASCSTDMCIHVCKLGQDRPIKTFQ 346
hTBL1X      DKTTII3-CK1WDAHTGEAKQ3-CK1QFPFHSAPALDVDWQ3-CK1NN3-CK1TFASCSTDMCIHV3-CK1CRLGCDR3-CK1VPVKT3-CK1FQ 358
mTBL1X      DKTTII3-CK1WDAHTGEAKQ3-CK1QFPFHSAPALDVDWQ3-CK1NN3-CK1TFASCSTDMCIHV3-CK1CRLGCDR3-CK1VPVKT3-CK1FQ 359
*****:*****:*****:*****:*****:*****

hTBL1R      GHTNEVNAIKWDPTGNLLASCSDDMTLKIWSMKQDNCVHDLQAHNKEIYTIKWSPTGPAT 406
mTBL1R      GHTNEVNAIKWDPTGNLLASCSDDMTLKIWSMKQDNCVHDLQAHNKEIYTIKWSPTGPAT 406
hTBL1X      GHTNEVNAIKWDPSGMLLASCSDDMTLKIWSMKQ4-CK1/GSK3EVCIHDLQAHNKEIYTIKWSPTGPAT 418
mTBL1X      GHTNEVNAIKWDPSGMLLASCSDDMTLKIWSMKQ4-CK1/GSK3DACVHDLQAHNKEIYTIKWSPTGPAT 419
*****:*****:*****:*****:*****:*****

hTBL1R      NNPANLMLASASFDSTVRLWDVDRGICIH4-CK1/GSK3TLTKHQEPVYSVAFSPDGRYLASGSFDKCV 466
mTBL1R      NNPANLMLASASFDSTVRLWDVDRGICIH4-CK1/GSK3TLTKHQEPVYSVAFSPDGRYLASGSFDKCV 466
hTBL1X      SNPN4-CK1/GSK3SNIMLASASFDSTVRLWDIERGVCTH4-CK1/GSK3TLTKHQEPVYSVAFSPDGKYLASGSFDKCV 478
mTBL1X      SNPN4-CK1/GSK3SNIMLASASFDSTVRLWDVERGVCIH4-CK1/GSK3TLTKHQEPVYSVAFSPDGKYLASGSFDKCV 479
.***:*****:*****:*****:*****:*****

hTBL1R      HIWNTQTGALVHSYRGTGGIFEVCWNAAGDKVGASASDGSVCVLDLRK 514
mTBL1R      HIWNTQTGALVHSYRGTGGIFEVCWNAAGDKVGASASDGSVCVLDLRK 514
hTBL1X      HIWNTQSGNLVHSYRGTGGIFEVCW4-CK1/GSK3NARGDKVGASASDGSVCVLDLRK 526
mTBL1X      HIWNTQSGSLVHSYRGTGGIFEVCW4-CK1/GSK3NARGDKVGASASDGSVCVLDLRK 527
*****:*****:*****:*****:*****:*****

```

**Figure S6. TBL1 and TBLR1 Sequence Alignment**

CustalW alignment of TBL1 and TBLR1 murine and human aminoacid sequences. Highlighted in yellow are the F-box and the six WD40 domains, in blue the TBL1-specific phosphorylation sites, in red the TBLR1-specific phosphorylation sites with predicted kinases.
